# Supplementary material
Source: publisher figshare collection journal article supplement (https://acs.figshare.com/ndownloader/files/23514559)
Supplement: Supplementary file 1 [file 23514559]

# **Analysis of DNA Adducts and Mutagenic Potency and Specificity in Rats Exposed to Acrylonitrile**

Vernon E. Walker,<sup>\*, \*\*, †, ‡, §, ||</sup> Timothy R. Fennell,<sup>†, ⊥</sup> Dale M. Walker,<sup>||, ¶</sup> Michael J. Bauer,<sup>††</sup>  
Patricia B. Upton,<sup>†, ‡‡</sup> George R. Douglas,<sup>§§</sup> and James A. Swenberg<sup>\*\*, †, ‡‡</sup>

<sup>†</sup>Chemical Industry Institute of Toxicology, Research Triangle Park, NC 27709, USA

<sup>‡</sup>Wadsworth Center and <sup>††</sup>Bureau of Occupational Health and Injury Prevention, New York State Department of Health, Albany, New York 12201, USA

<sup>§</sup>Department of Pathology and Laboratory Medicine, University of Vermont, Burlington, VT 05405, USA

<sup>||</sup>The Burlington HC Research Group, Inc., Jericho, VT 05465, USA

<sup>⊥</sup>RTI International, Center for Bioorganic Chemistry, Research Triangle Park, NC 27709, USA

<sup>¶</sup>Experimental Pathology Laboratories, Sterling VA 20167, USA

<sup>‡‡</sup>Department of Environmental Sciences and Engineering, University of North Carolina at Chapel Hill, Chapel Hill, NC 27599, USA

<sup>§§</sup>Environmental Health Science and Research Bureau, Health Canada, Ottawa, Ontario K1A 0K9, Canada

**\*Corresponding Author:** E-mail: [vwalker@uvm.edu](mailto:vwalker@uvm.edu), Phone: 802-777-9394.

**\*\***These authors contributed equally to this work, each having designed and directed interfacing projects: Animal exposures and experiments for DNA adduct studies were conducted at the Chemical Industry Institute of Technology and animal exposures and experiments for *Hprt* gene mutation studies were performed at the New York State Department of Health.

**Table S1. Manifestation of *Hprt* Mutant T-cells in Spleen of Female F344 Rats Following 4 Weeks of Drinking Water Exposure to 0 or 500 ppm Acrylonitrile<sup>a</sup>**

| Weeks post exposure | Mutant Frequency $\times 10^{-6}$ (Animal number) |                                | <i>P</i> -value |
|---------------------|---------------------------------------------------|--------------------------------|-----------------|
|                     | Controls <sup>b</sup>                             | Acrylonitrile-exposed          |                 |
| - 4                 | 2/6                                               |                                |                 |
|                     | 2.8                                               |                                |                 |
|                     | 2.4                                               |                                |                 |
|                     | Mean $\pm$ SE = 2.6 $\pm$ 0.1                     |                                |                 |
| 0                   | 3.32 (ANC10)                                      | 7.74 (AN5/13)                  |                 |
|                     | 2.93 (ANC11)                                      | 7.28 (AN5/14)                  |                 |
|                     | 2.93 (ANC12)                                      | 7.75 (AN5/15)                  |                 |
|                     | Mean $\pm$ SE = 3.0 $\pm$ 0.2                     | 11.28 (AN5/16)                 |                 |
|                     |                                                   | 8.53 (AN5/17)                  |                 |
|                     |                                                   | Mean $\pm$ SE = 8.5 $\pm$ 0.7  | < 0.001*        |
| 2                   | 3.15 (ANC13)                                      | 9.94 (AN5/18)                  |                 |
|                     | 2.91 (ANC14)                                      | 9.22 (AN5/19)                  |                 |
|                     | 2.63 (ANC15)                                      | 10.12 (AN5/20)                 |                 |
|                     | Mean $\pm$ SE = 2.9 $\pm$ 0.2                     | 8.57 (AN5/21)                  |                 |
|                     |                                                   | 11.25 (AN5/22)                 |                 |
|                     |                                                   | Mean $\pm$ SE = 9.8 $\pm$ 0.5  | < 0.001*        |
| 4                   | 3.24 (ANC18)                                      | 8.47 (AN5/23)                  |                 |
|                     | 2.64 (ANC19)                                      | 9.06 (AN5/24)                  |                 |
|                     | 1.95 (ANC20)                                      | 13.61 (AN5/25)                 |                 |
|                     | Mean $\pm$ SE = 2.6 $\pm$ 0.4                     | 14.44 (AN5/26)                 |                 |
|                     |                                                   | 10.08 (AN5/27)                 |                 |
|                     |                                                   | Mean $\pm$ SE = 11.1 $\pm$ 1.2 | < 0.001*        |
| 6                   | 2.23 (ANC21)                                      | 2.43 (AN5/28)                  |                 |
|                     | 2.00 (ANC22)                                      | 1.86 (AN5/29)                  |                 |
|                     | 1.52 (ANC23)                                      | 2.12 (AN5/31)                  |                 |
|                     | Mean $\pm$ SE = 1.9 $\pm$ 0.2                     | 2.74 (AN5/32)                  |                 |
|                     |                                                   | Mean $\pm$ SE = 2.3 $\pm$ 0.2  | 0.13            |
| 8                   | 2.47 (ANC24)                                      | 8.20 (AN5/33)                  |                 |
|                     | 2.53 (ANC25)                                      | 3.33 (AN5/34)                  |                 |
|                     | 3.17 (ANC26)                                      | 5.01 (AN5/36)                  |                 |
|                     | Mean $\pm$ SE = 2.7 $\pm$ 0.2                     | 2.86 (AN5/37)                  |                 |
|                     |                                                   | Mean $\pm$ SE = 4.9 $\pm$ 1.2  | 0.09            |

<sup>a</sup> Groups of rats were exposed to 0 or 500 ppm acrylonitrile in drinking water for 4 weeks, and then necropsied at 0, 2, 4, 6, or 8 weeks after the cessation of exposure for isolation of splenic lymphocytes and measurement of *Hprt* mutant frequencies using a T-cell cloning assay.

<sup>b</sup> Mean for all controls ( $n = 18$ ) = 2.6  $\pm$  0.1 (SE)  $\times 10^{-6}$ .

\* Significantly different at  $p < 0.05$  for pairwise tests, Mann-Whitney U-statistic or Student's t-test.

**Table S2. Dose-Response for *Hprt* Mutant T-cells in Spleen of Female F344 rats Following Drinking Water Exposure to Acrylonitrile<sup>a</sup>**

| Exposure level<br>(ppm) | Average daily dose<br>(mg/kg bw/day) <sup>b</sup> | Observed mutant frequency $\times 10^{-6}$<br>(Animal number)                                                                       | Average induced mutant<br>frequency ( $\times 10^{-6}$ ) <sup>c</sup> | <i>P</i> -value |
|-------------------------|---------------------------------------------------|-------------------------------------------------------------------------------------------------------------------------------------|-----------------------------------------------------------------------|-----------------|
| 0                       | 0                                                 | 3.24 (ANC18)<br>2.64 (ANC19)<br>1.95 (ANC20)<br>Mean $\pm$ SE = 2.6 $\pm$ 0.4                                                       | ---                                                                   |                 |
| 33                      | 8                                                 | 2.52 (AN33/1)<br>4.06 (AN33/2)<br>3.56 (AN33/3)<br>3.36 (AN33/4)<br>3.55 (AN33/5)<br>Mean $\pm$ SE = 3.4 $\pm$ 0.3                  | 0.8 $\pm$ 0.3                                                         | 0.057           |
| 100                     | 21                                                | 6.93 (AN1/5)<br>4.64 (AN1/6)<br>5.90 (AN1/7)<br>4.92 (AN1/8)<br>3.10 (AN1/9)<br>Mean $\pm$ SE = 5.1 $\pm$ 0.6                       | 2.5 $\pm$ 0.6                                                         | 0.036*          |
| 500                     | 76                                                | 8.47 (AN5/23)<br>9.06 (AN5/24)<br>13.61 (AN5/25)<br>14.44 (AN5/26)<br>10.08 (AN5/27)<br>Mean $\pm$ SE = 11.1 $\pm$ 1.2 <sup>d</sup> | 8.5 $\pm$ 1.2                                                         | 0.018*          |

<sup>a</sup> Groups of rats (4-week-old) were exposed to 0, 33, 100 or 500 ppm acrylonitrile in drinking water for 4 weeks, and then necropsied 4 weeks after the cessation of exposure for isolation of splenic lymphocytes and measurement of *Hprt* mutant frequencies using a cloning assay.

<sup>b</sup> Water consumption and body weight data were used to estimate the maximal average daily dose of acrylonitrile as described in the Materials and Methods (see Figure 1).

<sup>c</sup> The average induced mutant frequency equals the average experimentally observed mutant frequency minus the average background mutant frequency in control rats.

<sup>e</sup> Significantly elevated at 500 ppm acrylonitrile compared to mutant frequency values at 33 or 100 ppm acrylonitrile (*p*-value < 0.05), Dunn's method.

\* Significantly different at *P* < 0.05 for pairwise tests, Mann-Whitney U-statistic or Student's *t*-test.

**Table S3. Base Alterations in *Hprt* Exon 3 of Splenic T-Cells from F344 Rats Exposed to Acrylonitrile<sup>a</sup>**

| Base <sup>b</sup> and mutation <sup>c</sup> | Animal Number |        |        |        |        |        |        |        | Total |
|---------------------------------------------|---------------|--------|--------|--------|--------|--------|--------|--------|-------|
|                                             | AN5/9         | AN5/10 | AN5/18 | AN5/19 | AN5/20 | AN5/21 | AN5/22 | AN5/23 |       |
| 135 G→T                                     |               |        |        |        |        |        | 1      |        | 1     |
| 137 C→T                                     | 2             |        |        |        |        |        |        |        | 2     |
| 140 A→T                                     |               |        |        |        |        |        |        | 1      | 1     |
| 143 G→A                                     |               |        |        |        |        |        | 1      |        | 1     |
| 148 G→C <sup>e</sup>                        |               | 2      |        |        |        |        |        |        | 2     |
| 154 G→A <sup>d,e</sup>                      |               |        | 1      |        | 1      |        |        | 2      | 4     |
| 157 G→T                                     | 1             |        |        |        |        |        |        |        | 1     |
| 164 A→T <sup>d,e,f</sup>                    |               | 1      |        |        |        |        |        |        | 1     |
| 168 A→G                                     | 1             |        |        |        |        |        |        |        | 1     |
| 173 G→A <sup>g</sup>                        | 1             |        |        |        |        |        |        |        | 1     |
| 179 A→G                                     |               |        |        |        |        | 1      |        |        | 1     |
| 182 A→T                                     |               |        |        |        |        | 1      |        |        | 1     |
| 204 G→C                                     |               |        |        |        |        | 1      |        |        | 1     |
| 205 A→G                                     |               |        |        |        |        | 1      |        |        | 1     |
| 205 A→T <sup>e</sup>                        |               |        |        |        | 1      |        |        |        | 1     |
| 206 A→G <sup>f</sup>                        |               |        | 1      |        |        |        |        |        | 1     |
| 206 A→C                                     |               |        |        | 1      |        |        |        |        | 1     |
| 206 A→T <sup>g</sup>                        |               |        |        |        |        | 1      |        |        | 1     |
| 207 G→C <sup>f</sup>                        | 1             |        |        |        |        |        |        |        | 1     |
| 208 G→A <sup>d,e,g</sup>                    |               |        |        |        |        |        | 1      |        | 1     |
| 209 G→A                                     |               |        |        | 2      |        |        |        |        | 2     |
| 215 A→C <sup>d</sup>                        |               |        |        | 1      |        |        | 1      |        | 2     |
| 218 A→T                                     |               |        | 1      |        |        |        |        |        | 1     |
| 221 T→C <sup>d,f,g</sup>                    |               |        |        |        |        | 1      |        |        | 1     |
| 221 T→G                                     | 1             |        |        |        |        |        |        |        | 1     |
| 223 T→C <sup>f,g</sup>                      | 1             |        |        |        |        | 1      |        | 2      | 4     |
| 233 T→C                                     |               |        |        | 1      |        |        |        |        | 1     |
| 252 G→A                                     |               |        |        |        |        | 1      |        |        | 1     |
| 140 +T <sup>d</sup>                         |               |        |        |        |        |        |        | 1      | 1     |
| 145-146<br>CTT→TGT                          |               | 1      |        |        |        |        |        |        | 1     |
| 181-183<br>CAC→CTG                          |               |        |        |        |        | 1      |        |        | 1     |
| 196 +A                                      |               |        |        |        | 1      |        |        |        | 1     |
| 207-212 +G <sup>d,f</sup>                   |               | 1      |        |        |        | 1      |        |        | 2     |
| 207-212 -G <sup>e,f,g</sup>                 |               |        |        |        |        |        |        | 1      | 1     |
| 219 -G <sup>g</sup>                         |               |        |        |        |        | 1      |        |        | 1     |
| Total                                       | 8             | 5      | 3      | 5      | 3      | 11     | 4      | 7      | 46    |

<sup>a</sup> Splenic T-cells were collected for the *Hprt* cloning and selection assay at 2 or 4 weeks after cessation of drinking water exposure of female F344 rats for 4 weeks to 500 ppm acrylonitrile.

<sup>b</sup> Numbering of the rat *Hprt* gene according to<sup>51</sup>.

<sup>c</sup> The mutation in the non-transcribed strand is reported.

<sup>d</sup> The same mutation was found in F344 rats exposed to 1,3-butadiene (Table 8 in<sup>43</sup>).

<sup>e</sup> The same mutation was found in F344 rats exposed to butadiene diepoxide (Table 10 in<sup>43</sup>).

<sup>f</sup> The same mutation was found in B6C3F1 mice exposed to 1,3-butadiene (Table 7 in<sup>43</sup>).

<sup>g</sup> The same mutation was found in mice exposed to butadiene diepoxide (Table 9 in<sup>43</sup>).

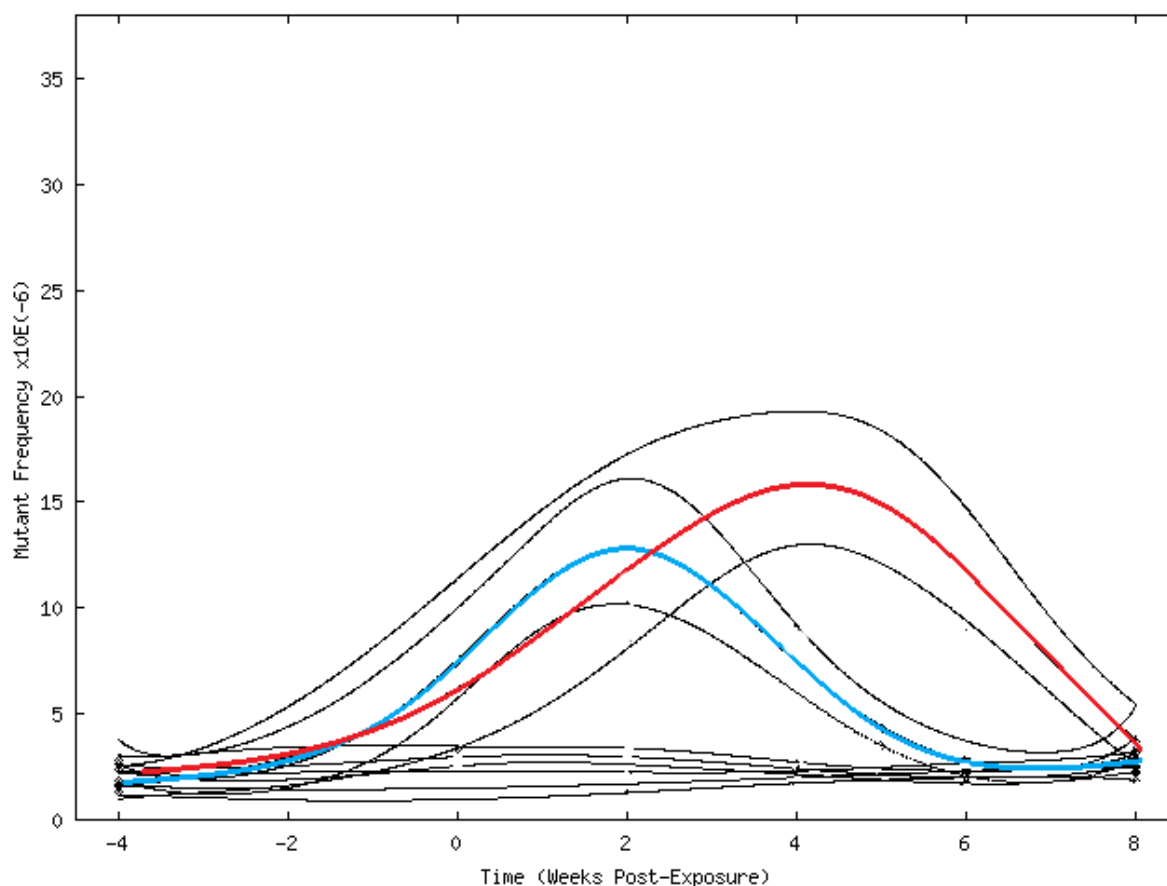

**Figure S1.** Relationships between the time elapsed since exposure and *Hprt* mutant frequencies in splenic T-cells of female F344 rats (4 weeks old) exposed for 4 weeks to 500 ppm acrylonitrile (blue curve) versus female B6C3F1 mice (4-5 weeks old) exposed for 4 weeks (6 h/day, 5 days/week) to 0 or 625 ppm 1,3-butadiene (red curve). Animals were necropsied before initiation of exposure (-4 week timepoint), after 2 weeks of exposure (-2 week timepoint), and up to 8 weeks after the last day of exposure. Curves were fit to the *Hprt* mutant frequencies of individual rats exposed to acrylonitrile or mice exposed to 1,3-butadiene, 95% confidence limits were determined (black curves), and the mutagenic potency estimate for each exposure scenario was obtained as described in the Materials and Methods.
